# Supplementary material
Source: publisher figshare collection journal article supplement (https://frontiersin.figshare.com/ndownloader/files/25397693)
Supplement: Supplementary file [file 25397693]

## SUPPLEMENTARY DATA

### SUPPLEMENTARY FIGURES LEGENDS

**Supplementary Figure S1.** Variation of *RPL10A*, *RPL10B* and *RPL10C* transcript levels. **(A)** Microarray data of *RPL10A*, *RPL10B* and *RPL10C* transcript levels during germination. Seeds were directly removed from the silique (Harvest), desiccated for 15 days in darkness (0 h) and stratified at 4°C in the dark for 48 h. Seeds were then transferred into continuous light and further collected at 1, 6, 12, 24 and 48 h (Narsai et al., 2011). **(B)** Developmental transcriptomic profiling of *RPL10A*, *RPL10B* and *RPL10C* genes during seed germination based on RNA-seq data (Klepikova et al., 2016). **(C)** Transcript levels of *RPL10A*, *RPL10B* and *RPL10C* genes in one-day-old seedling, based on RNA-seq data (Klepikova et al., 2016). **(D)** Microarray data of *RPL10A* transcript levels in mesophyll and guard cells without (Mock) or with 100  $\mu$ M ABA treatment (Arabidopsis electronic Fluorescent Pictograph (eFP) Browser, Winter et al., 2007; Yang et al., 2008).

**Supplementary Figure S2.** Expression analysis of *RPL10* genes in WT, *rp10A/+* mutants and *RPL10A*-overexpressing plants. **(A)** Transcript levels of *RPL10A*, *RPL10B* and *RPL10C* genes in WT and *rp10A-1/+* after 4 h of 10  $\mu$ M ABA treatment relative to control condition (without ABA, Control) (ABA/C). analyzed by RT-qPCR. *ACTIN2* was used as a gene reference. Results represent the average  $\pm$  SE from three biological replicates. Different letters over the bar indicate statistical differences between samples applying ANOVA test ( $P < 0.05$ ). **(B)** Transcript levels of *RPL10A*, *RPL10B* and *RPL10C* genes in WT and *rp10A-1/+* mutant seedlings grown in MS-agar medium analyzed by RT-qPCR. *ACTIN2* was used as a gene reference. Each *RPL10* gene was normalized against *RPL10A* in WT seedlings set as 1. Different letters over the bar indicate statistical differences between samples applying ANOVA test ( $P < 0.05$ ).

**Supplementary Figure S3.** Response of *rp10A/+* mutants to exogenous ABA. **(A)** Germination percentages of WT, *rp10A-1/+* and *rp10A-2/+* mutants on MS-agar medium (MS) or MS-agar medium supplemented with 1  $\mu$ M ABA (MS + ABA) at 72 h after stratification. Different letters over the bars indicate statistical differences between genotypes and conditions applying ANOVA test ( $P < 0.05$ ). **(B, C)** Germination percentages of WT and *rp10A/+* mutant seeds (*rp10A-1/+* and *rp10A-2/+*) on MS-agar medium supplemented with 0.5  $\mu$ M (B, MS + 0.5  $\mu$ M ABA) (B) or 2  $\mu$ M ABA (C, MS + 2  $\mu$ M ABA) (C). Results are the mean of three independent experiments  $\pm$  SE ( $n = 150$  for each biological experiment). The asterisks indicate statistical differences between WT and each mutant at each time applying Student's t-test ( $P < 0.05$ ).

**Supplementary Figure S4.** Effect of ABA on cotyledon greening and seedling development. **(A)** Phenotypic comparison of WT, *rp10A-1/+* and *RPL10A*-OE seedlings grown on MS-agar medium (MS) at 4 days after stratification or on MS-agar medium supplemented with 1  $\mu$ M ABA (MS + ABA) at 8 days after stratification. Heterozygous *rp10A-1* mutant seedlings are indicated with asterisks. **(B)** Percentage of seedling establishment (recorded when leaf #4 is emerging) of WT, *rp10A/+* mutants (*rp10A-1/+* and *rp10A-2/+*) and *RPL10A*-OE lines (*RPL10A*-OE3 and *RPL10A*-OE5) grown on MS-agar medium at 12 days after stratification. Results

represent the average from three independent experiments  $\pm$  SE ( $n = 100$  for each biological experiment). For each genotype, different letters over the bars indicate statistical differences applying ANOVA test ( $P < 0.05$ ). Heterozygous *rpl10A-1* mutant seedlings are indicated with asterisks. **(C)**. Phenotypic comparison of WT, *rpl10A* mutants (*rpl10A -1/+*, and *rpl10A-2/+*) and *RPL10A*-OE seedlings. Photographs were taken 12 days after stratification.

**Supplementary Figure S5.** ABA Inhibition of primary root elongation and lateral root density of WT and *RPL10A*-overexpressing seedlings. **(A)** Representative images of WT and *RPL10A*-OE seedlings grown on MS-agar plates and transferred to MS-agar medium (MS) or MS-agar medium supplemented with 10  $\mu$ M ABA (MS + ABA) 4 days after the transfer. Bars = 0.5 cm. **(B)** Primary root elongation in WT and *RPL10A*-OE seedlings measured each day after the transfer. Results are the mean of three independent experiments ( $n = 20$  for each biological experiment). For each genotype and condition (with or without 10  $\mu$ M ABA), different letters over the bars indicate statistical differences applying ANOVA test ( $P < 0.05$ ). **(C)** Average root lengths after the transfer to ABA treatment relative to control conditions (ABA/C). **(D)** LR density estimated as the number of LRs per root length unit of WT and *RPL10A*-OE seedlings. The number of LRs was determined 4 days after the transfer of 5-days-old seedlings to plates supplemented or not with ABA. Results are the mean of three independent experiments  $\pm$  SE ( $n = 20$  for each biological experiment). For each genotype and condition (MS or MS + ABA), different letters over the bars indicate statistical differences applying ANOVA test ( $P < 0.05$ ). **(E)** LR density measured 4 days after the transfer of 5-days-old seedlings to plates supplemented with ABA relative to control conditions (ABA/C).

**Supplementary Figure S6.** Response of *rpl10A/+* seedlings to ABA treatment at post-germination stage. Seven-days-old seedlings grown in MS-agar medium were transferred to MS-agar (MS) or MS-agar medium supplemented with 5  $\mu$ M ABA (MS + ABA). Ten days after the transfer, petiole length **(A)**, leaf number **(B)** were measured. **(C)** Variation of the chlorophyll (Chl) content per mg fresh weight<sup>-1</sup> (FW) during ABA treatment. **(D)** Representative images of WT and *rpl10A-1/+* mutant plants at 8 (upper panel) and 10 days (lower panel) after the transfer to MS-agar medium supplemented with 5  $\mu$ M ABA. Asterisks indicate heterozygous *rpl10A-1* mutant seedlings. Results are the mean of three independent experiments  $\pm$  SE ( $n = 30$  for each biological experiment). For each genotype and condition (with or without 5  $\mu$ M ABA), different letters over the bars indicate statistical differences applying ANOVA test at  $P < 0.05$ .

**Supplementary Figure S7.** *In silico* analysis of Arabidopsis *RPL10A* promoter. cis-elements presented in the promoter are represented with different color. A scale covering from -1000 bp to +56 bp is showed at the top of the figure. The 5'UTR is represented in white color.

**Table S1. List of primers used in this work.**

Response of *rpl10A/+* seedlings to ABA treatment at post-germination stage.

## **SUPPLEMENTARY REFERENCES**

Yang Y., Costa A., Leonhardt N., Siegel R.S., Schroeder J.I., (2008). Isolation of a strong *Arabidopsis* guard cell promoter and its potential as a research tool. *Plant Methods* 19, 4-6.

**Figure S1.** Variation of *RPL10A*, *RPL10B* and *RPL10C* transcript levels.

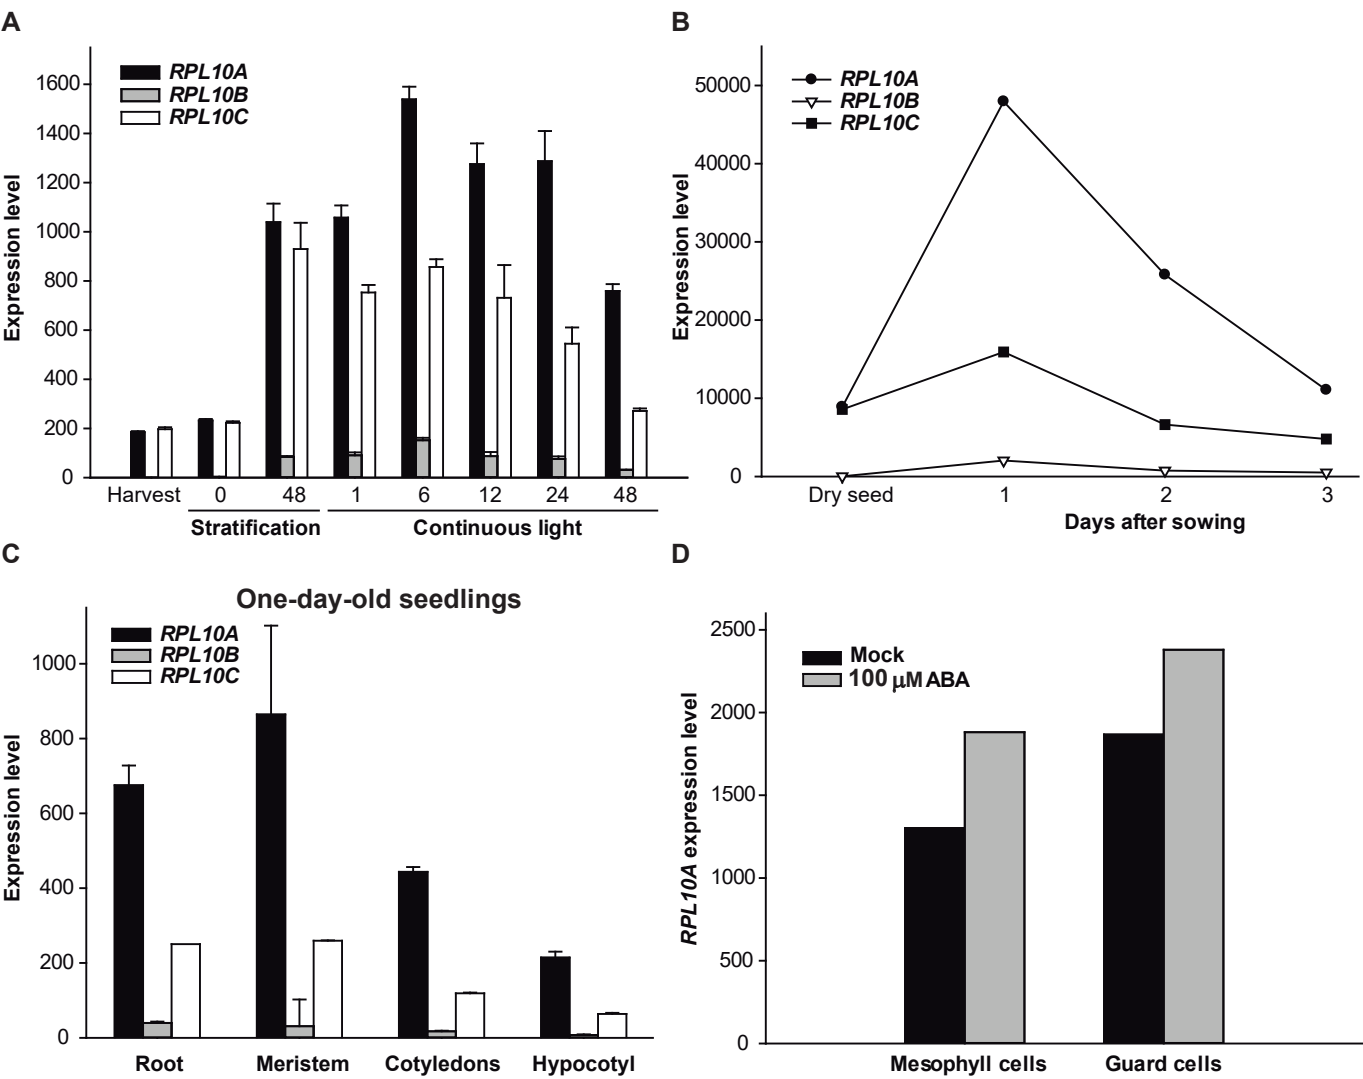

**Figure S2.** Expression analysis of *RPL10* genes in WT, *rp10A-1/+* mutants and *RPL10A*-overexpressing plants.

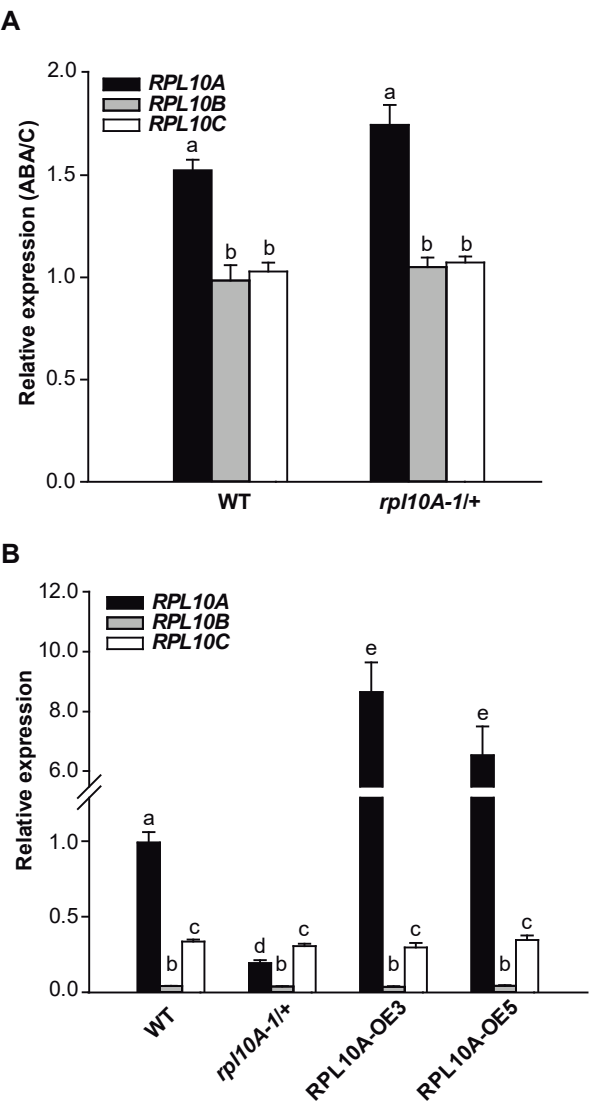

**Figure S3.** Response of *rpl10A*/+ mutants to exogenous ABA.

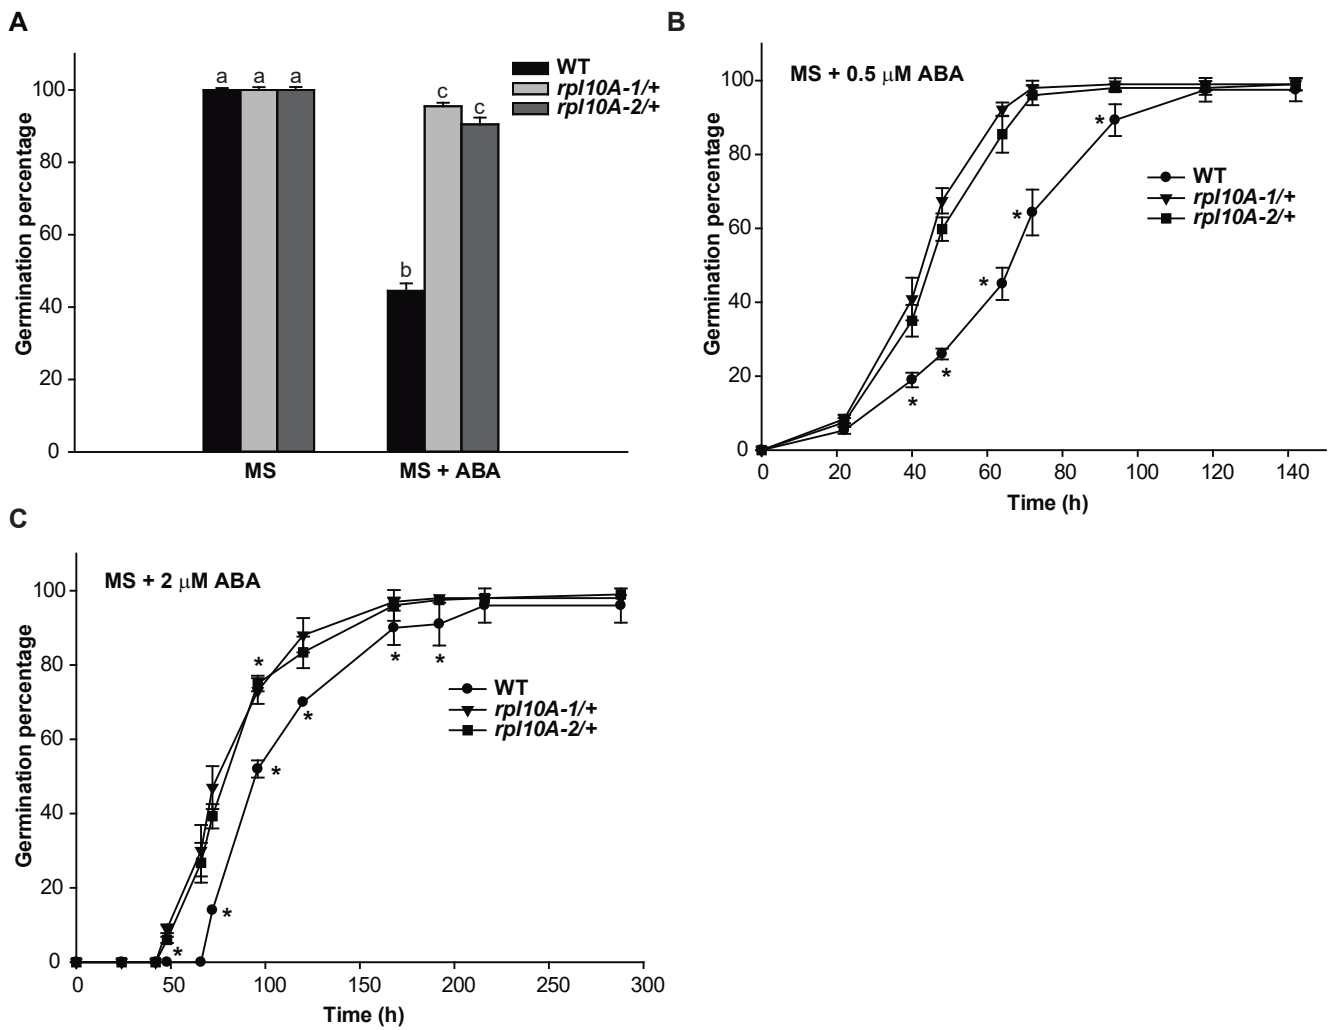

**Figure S4.** Effect of ABA on cotyledon greening and seedling development.

**A**

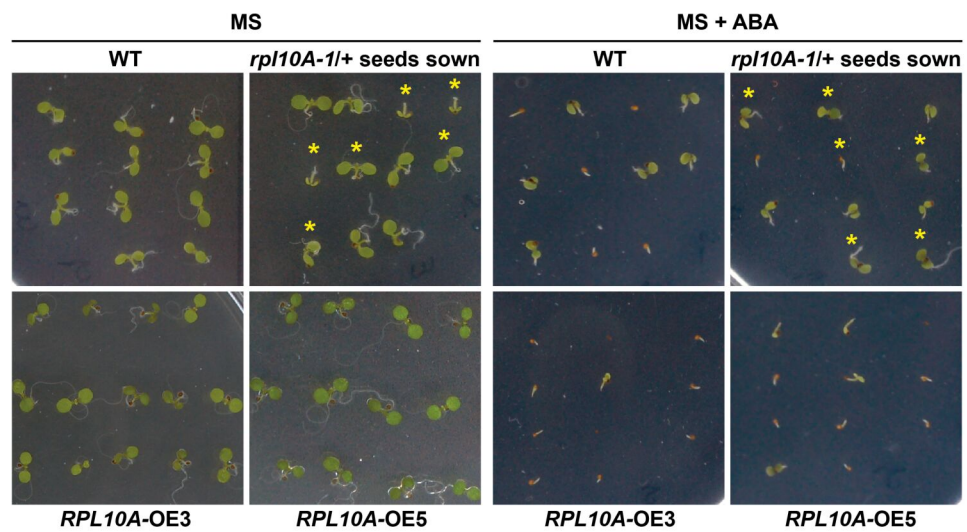

**B**

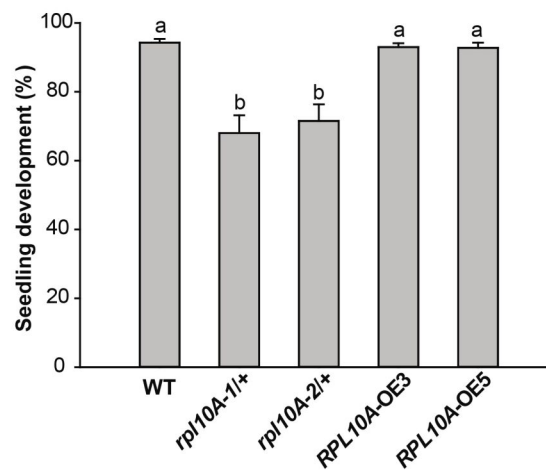

**C**

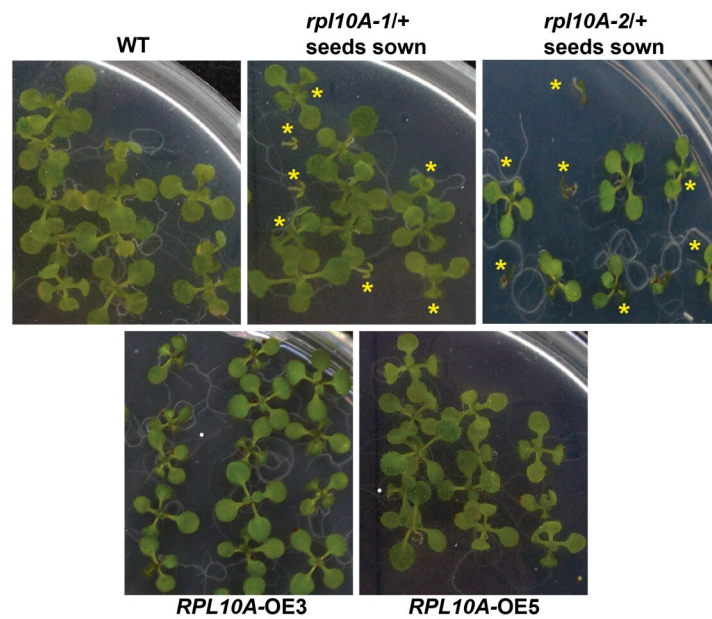

**Figure S5.** ABA Inhibition of primary root elongation and lateral root density of WT and *RPL10A*-overexpressing seedlings.

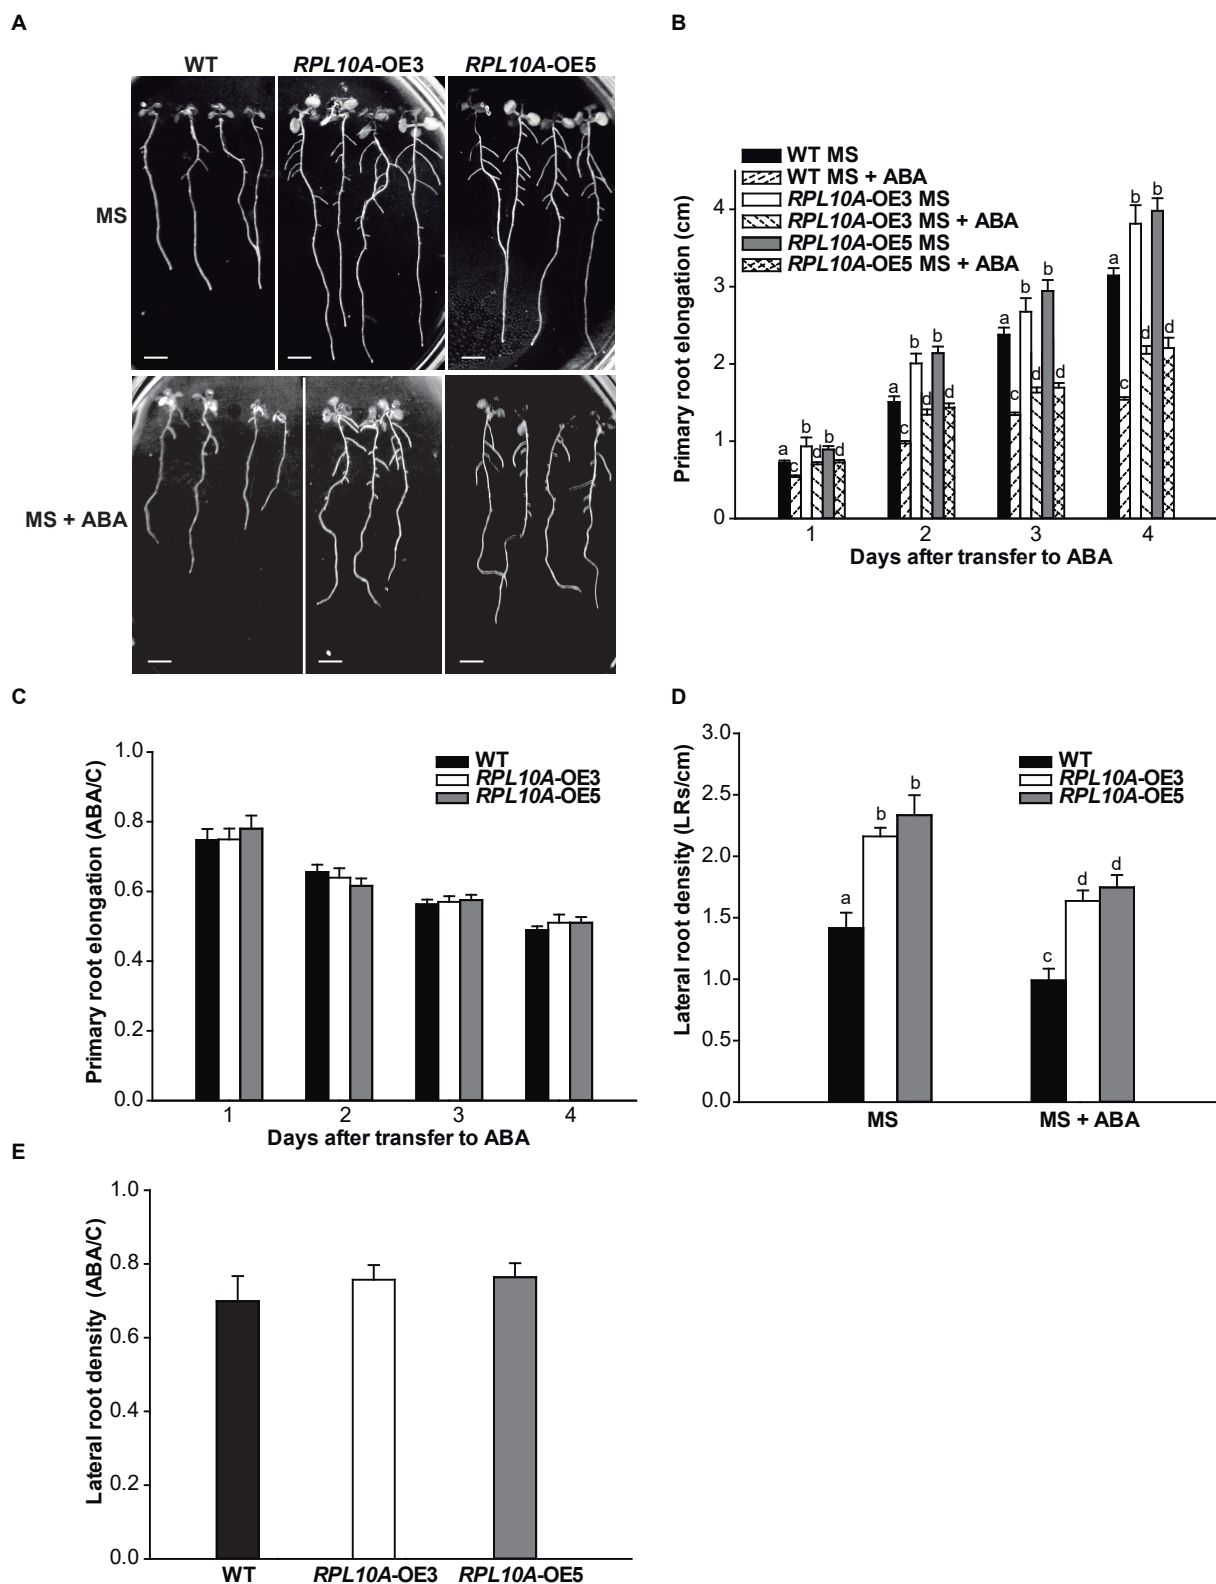



**Figure S6.** Response of *rpl10A*/+ seedlings to ABA treatment at post-germination stage.

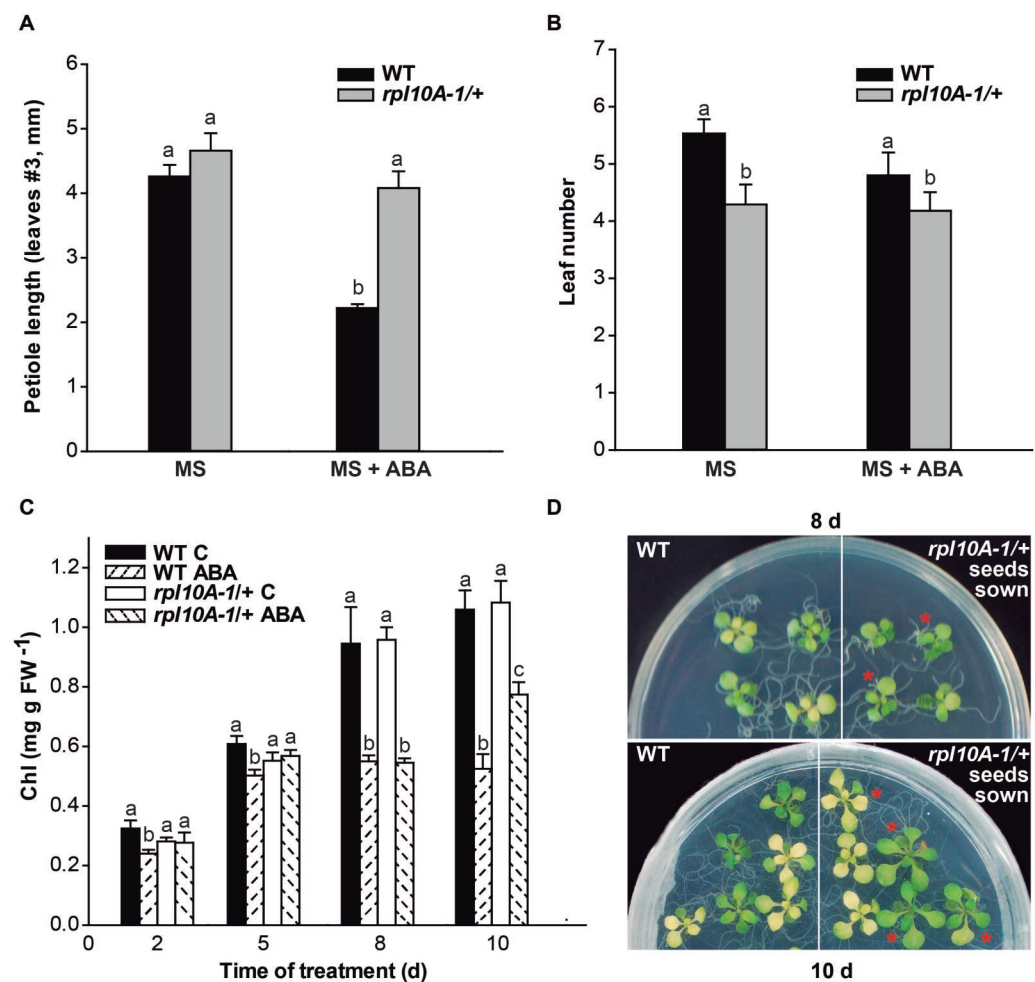

**Figure S7.** *In silico* analysis of Arabidopsis *RPL10A* promoter.

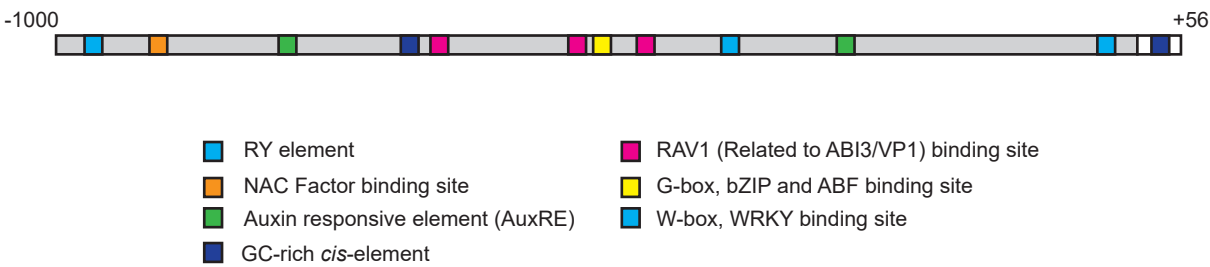

**Table S1. List of primers used in this work.**

| Primer name                 | Sequence                          | Purpose                           |
|-----------------------------|-----------------------------------|-----------------------------------|
| <i>F-RPL10A-1</i>           | 5'TACGATGTTGGTATGAAGAG3'          | Screening of heterozygous mutants |
| <i>R-RPL10A-1</i>           | 5'TCACCGGAATGAGAAGGA3'            | Screening of heterozygous mutants |
| <i>L-LBSALK</i>             | 5'TGGTTCACGTAGTGGGCCATCG3'        | Screening of heterozygous mutants |
| <i>F-RPL10A-RT</i>          | 5'TCCTTCTCATTCCGGTGA3'            | RT-qPCR                           |
| <i>R-RPL10A-RT</i>          | 5'GCCAAGAACGAAGGAACA3'            | RT-qPCR                           |
| <i>F-RPL10A-RT2</i>         | 5'CAGGAAATGGGGCTTCACGAAG3'        | RT-qPCR (OE lines)                |
| <i>R-RPL10A-RT2</i>         | 5'GTAGTGGGCTGGCAAAAAGGC3'         | RT-qPCR (OE lines)                |
| <i>F-RPL10B-RT</i>          | 5'TCCCTGGTCGTCAAAAGA3'            | RT-qPCR                           |
| <i>R-RPL10B-RT</i>          | 5'AGCACCAGCTGACAAGAA3'            | RT-qPCR                           |
| <i>F-RPL10C-RT</i>          | 5'CCAACACCGAAGATCCAA3'            | RT-qPCR                           |
| <i>R-RPL10C-RT</i>          | 5'TTTTGGGATCTGGCACAC3'            | RT-qPCR                           |
| <i>F-35S<sub>prom</sub></i> | 5'GAGGAGCATCGTGGAAAAAGA3'         | Screening of OE lines             |
| <i>L-ACTIN2</i>             | 5'CAGATGCCCAGAAGTCTTGTTTC3'       | RT-qPCR                           |
| <i>R-ACTIN2</i>             | 5'AACGACCTTAATCTTCATGCTGC3'       | RT-qPCR                           |
| <i>F-KpnI-RPL10A</i>        | 5'GACTAGGTACCATGGGAAGAAGACCTGCG3' | Cloning                           |
| <i>R-SaII-RPL10A</i>        | 5'TGTCAGTCGACTCAGTAGTGGGCTGGCAA3' | Cloning                           |
